# Supplementary material for: Two new manganese-based phosphomolybdate compounds as electrochemical sensors for the highly sensitive trace determination of heavy metal Cr(vi) ions
Source: Royal Society of Chemistry journal article supplement (doi:10.1039/d3ce00517h), 2023-01-01
Supplement: d3ce00517h1.pdf [file d3ce00517h1.pdf]

# Two Novel Manganese-based Phosphomolybdate Compounds as Electrochemical Sensors for the Highly Sensitive Trace Determination of Heavy Metal Cr(VI) Ions

Jinling Wang,<sup>‡a</sup> Xiaohui Liu,<sup>‡a</sup> Zhihan Chang,<sup>\*a</sup> Na Xu,<sup>\*a</sup> and Xiuli Wang<sup>a</sup>

<sup>a</sup>College of Chemistry and Materials Engineering, Bohai University, Liaoning Professional Technology Innovation Center of Liaoning Province for Conversion Materials of Solar Cell, Jinzhou 121013, P. R. China.

## Materials and methods

Chemical medicines were purchased commercially from suppliers. All chemical reactants were used directly. The H<sub>2</sub>SO<sub>4</sub>-Na<sub>2</sub>SO<sub>4</sub> buffer solutions were prepared by the sulfuric acid and sodium sulfate. The single-crystal diffraction data for compounds **1**–**2** were collected by using a Bruker SMART APEX II CCD diffractometer at 293 K with Mo K $\alpha$  radiation ( $\lambda = 0.71073 \text{ \AA}$ ). The Varian 640 FT-IR spectrometer was used for FT-IR spectra (KBr pellets). Powder X-ray diffraction (PXRD) patterns of the samples were measured by a D/teX Ultra diffractometer. Thermogravimetric analyses (TGA) were performed on a Pyris Diamond TGA instrument under a flowing N<sub>2</sub> atmosphere with a heating rate of 10 °C/min. Electrochemical experiments and electrochemical impedance spectroscopy (EIS) were received from CHI 760 Instruments. And the electrochemical test used a conventional three-electrode system: the titled compound modified carbon paste electrode as a working electrode, the platinum wire electrode as a counter electrode, and the Ag/AgCl electrode as a reference electrode. UV-vis absorption spectra were collected on an SP 1901 UV-vis spectrophotometer. CCDC: 2216720 and 2216721.

## X-ray crystallography

The structure of compounds **1**–**2** were solved by direct methods and refined finally by full-matrix least-squares on  $F^2$  using the SHELX-XL program of the SHELX-XT package.<sup>1–3</sup> The crystal and structure refinement data of compounds **1**–**2** are listed in Table S1. The selected bond lengths and bond angles are shown in Tables S2–S5.

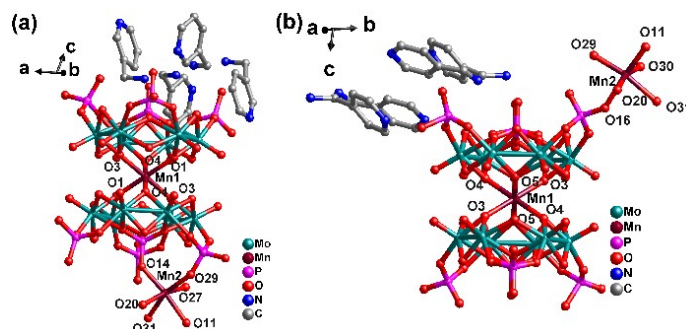

**Fig. S1** Coordination environment diagram of (a) compound **1** and (b) compound **2**. All hydrogen atoms have been omitted for clarity.

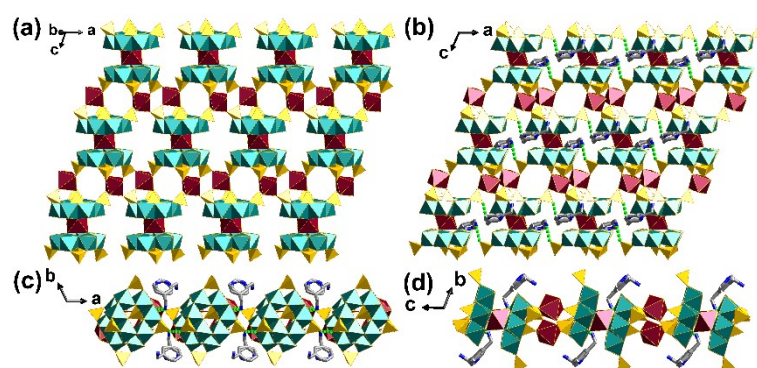

**Fig. S2** (a) The 2D structure diagram of compound **1**. The two hydrogen bonds between compound **1** and the organic ligand form a 3D structure along *b* (b), *c* (c), *a* (d) axis, respectively.

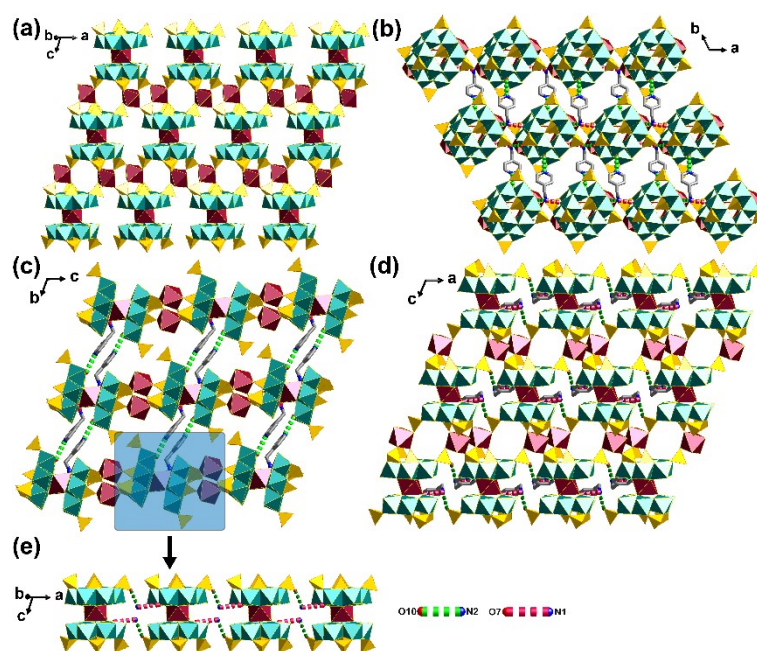

**Fig. S3** (a) The 2D structure diagram of compound **2**. The two hydrogen bonds between compound **2** and the organic ligand form a 3D structure along *c* (b), *a* (c), *b* (d) axis, respectively. (e) Hourglass polyoxoanions interact with organic ligands through two types of hydrogen bonds to form 1D chain along *a* axis.

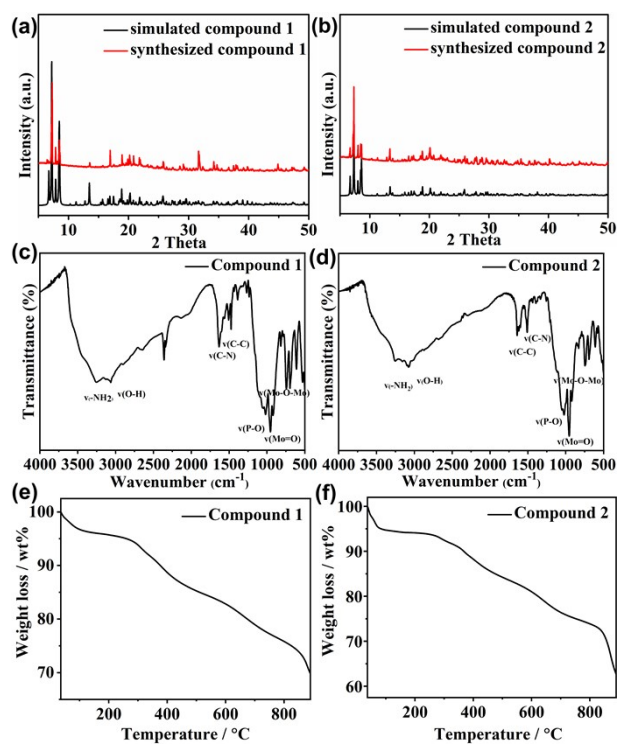

**Fig. S4** (a) The PXRD of compound 1 (b) The PXRD of compound 2 (c) The IR of compound 1 (d) The IR of compound 2 (e) The TGA of compound 1 (f) The TGA of compound 2.

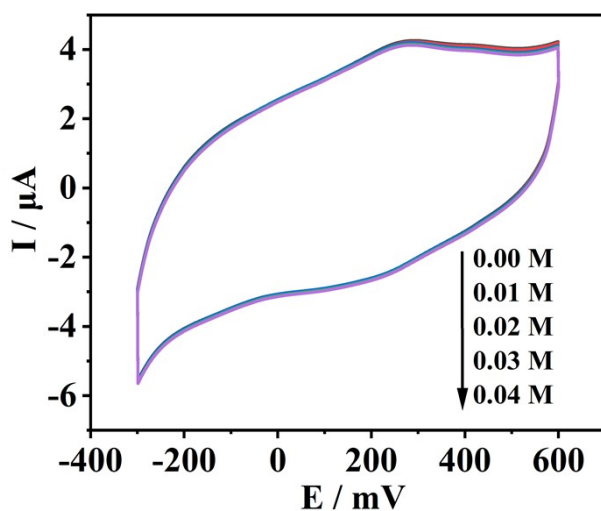

**Fig. S5** The CV curve of bare GP-CPE in a buffer solution containing different concentrations of Cr(VI).

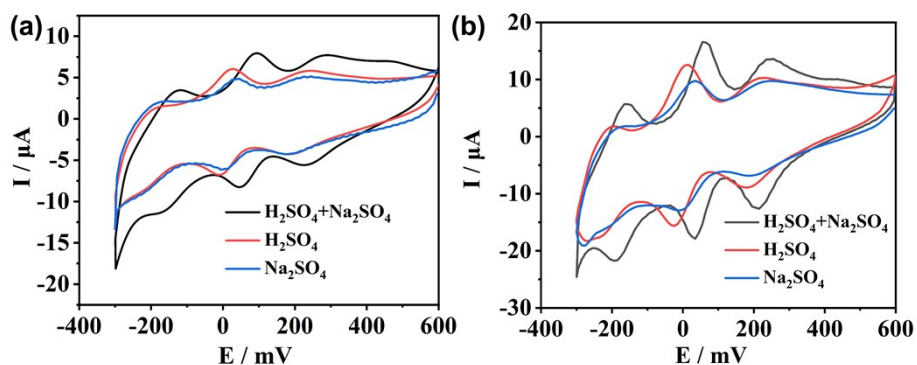

**Fig. S6** CV curves of (a) 1-CPE, (b) 2-CPE in different detection solutions.

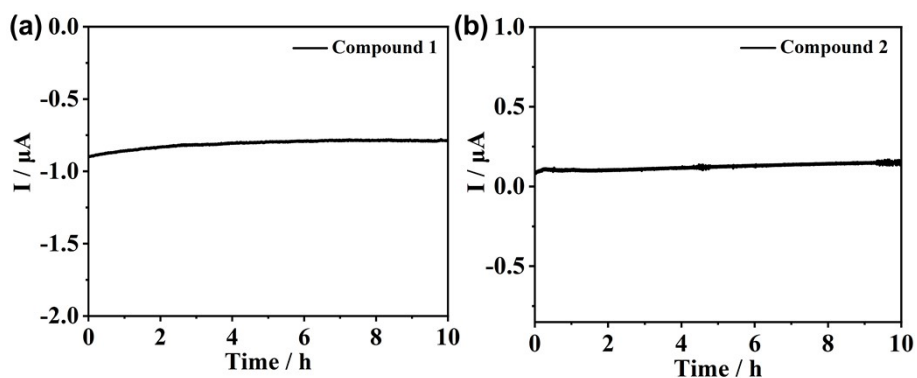

**Fig. S7** The stability of (a) 1-CPE, (b) 2-CPE in  $500\mu\text{M}$  Cr(VI) ion was tested in  $\text{H}_2\text{SO}_4\text{-Na}_2\text{SO}_4$  buffer solution.

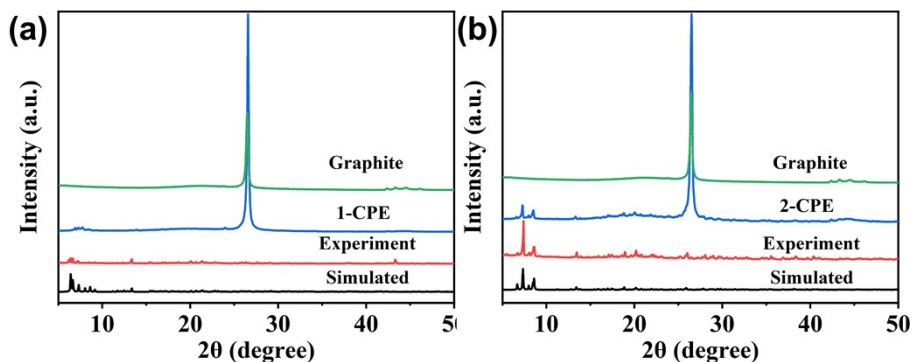

**Fig. S8** The PXRD of (a) 1-CPE, (b) 2-CPE and graphite after amperometric detection of Cr(VI) ions over 10 h.

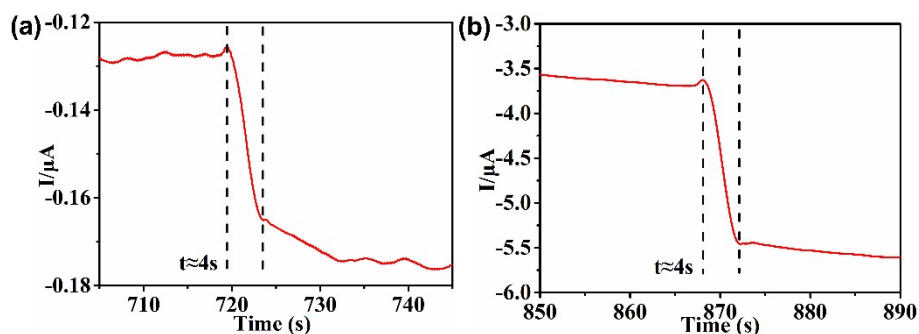

**Fig. S9** Response time diagram of compound 1 (a), 2 (b) for the detection of Cr(VI) in the  $0.1\text{ M H}_2\text{SO}_4\text{-}0.5\text{ M Na}_2\text{SO}_4$  solution.

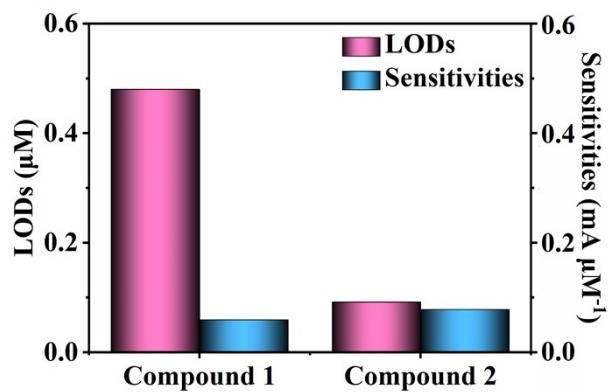

**Fig. S10** The comparison of LOD and sensitivities of compounds 1–2 to Cr(VI) ions. (The red part is the detection limit, and the blue part is the sensitivity).

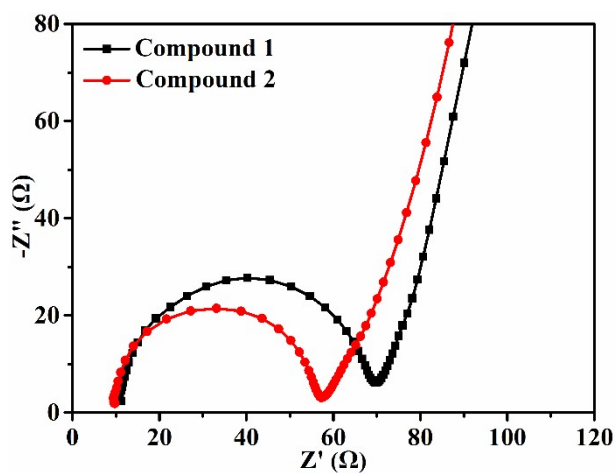

**Fig. S11** Electrochemical impedance spectra (EIS) of the 1–CPE and 2–CPE.

**Table S1** Crystal data of compounds **1–2**.

| <b>Compound</b>                              | <b>1</b>                                                                                                       | <b>2</b>                                                                                                       |
|----------------------------------------------|----------------------------------------------------------------------------------------------------------------|----------------------------------------------------------------------------------------------------------------|
| Empirical formula                            | C <sub>24</sub> H <sub>40</sub> Mn <sub>3</sub> Mo <sub>12</sub> N <sub>8</sub> O <sub>66</sub> P <sub>8</sub> | C <sub>24</sub> H <sub>34</sub> Mn <sub>3</sub> Mo <sub>12</sub> N <sub>8</sub> O <sub>66</sub> P <sub>8</sub> |
| Formula weight                               | 3060.50                                                                                                        | 3054.45                                                                                                        |
| Wavelength                                   | 0.71073 Å                                                                                                      | 0.71073 Å                                                                                                      |
| Crystal system                               | Triclinic                                                                                                      | Triclinic                                                                                                      |
| Space group                                  | <i>P</i> $\bar{1}$                                                                                             | <i>P</i> $\bar{1}$                                                                                             |
| <i>a</i> (Å)                                 | 12.0309 (8)                                                                                                    | 11.9440 (3)                                                                                                    |
| <i>b</i> (Å)                                 | 14.7291 (9)                                                                                                    | 13.7940 (4)                                                                                                    |
| <i>c</i> (Å)                                 | 13.9974(9)                                                                                                     | 14.6825 (4)                                                                                                    |
| $\alpha$ (°)                                 | 103.2760 (10)                                                                                                  | 102.6370 (10)                                                                                                  |
| $\beta$ (°)                                  | 106.7290 (10)                                                                                                  | 106.00                                                                                                         |
| $\gamma$ (°)                                 | 110.0090 (10)                                                                                                  | 110.82                                                                                                         |
| Volume (Å <sup>3</sup> ), Z                  | 2078.4 (2), 1                                                                                                  | 2033.94 (10), 1                                                                                                |
| Density (calculated)                         | 2.445 Mg/m <sup>3</sup>                                                                                        | 2.494 Mg/m <sup>3</sup>                                                                                        |
| Absorption coefficient                       | 2.451 mm <sup>-1</sup>                                                                                         | 2.504 mm <sup>-1</sup>                                                                                         |
| F(000)                                       | 1467                                                                                                           | 1461                                                                                                           |
| Crystal size (mm <sup>3</sup> )              | 0.24 × 0.22 × 0.2                                                                                              | 0.24 × 0.22 × 0.2                                                                                              |
| Goodness-of-fit on <i>F</i> <sup>2</sup>     | 1.074                                                                                                          | 1.033                                                                                                          |
| Final R indices [ <i>I</i> > 2σ( <i>I</i> )] | R <sub>1</sub> = 0.0411, wR <sub>2</sub> = 0.1139                                                              | R <sub>1</sub> = 0.0354, wR <sub>2</sub> = 0.1025                                                              |
| R indices (all data)                         | R <sub>1</sub> = 0.0444, wR <sub>2</sub> = 0.1163                                                              | R <sub>1</sub> = 0.0397, wR <sub>2</sub> = 0.1061                                                              |

**Table S2** Selected bond lengths (Å) of compound **1**.

| <b>Compound 1</b> |           |              |           |
|-------------------|-----------|--------------|-----------|
| Mo(1)–Mo(5)       | 2.5994(6) | Mo(1)–O(2)   | 2.112(3)  |
| Mo(1)–O(3)        | 1.969(3)  | Mo(1)–O(8)#1 | 2.255(3)  |
| Mo(1)–O(9)        | 2.060(3)  | Mo(1)–O(13)  | 1.682(4)  |
| Mo(1)–O(15)       | 1.941(4)  | Mo(2)–Mo(4)  | 2.5893(6) |
| Mo(2)–O(2)        | 2.130(4)  | Mo(2)–O(4)   | 1.977(3)  |
| Mo(2)–O(8)#1      | 2.267(3)  | Mo(2)–O(17)  | 2.064(4)  |
| Mo(2)–O(19)       | 1.934(4)  | Mo(2)–O(28)  | 1.680(4)  |
| Mo(3)–Mo(6)       | 2.5888(6) | Mo(3)–O(1)   | 1.981(3)  |
| Mo(3)–O(6)        | 2.114(4)  | Mo(3)–O(10)  | 1.942(4)  |
| Mo(3)–O(12)#1     | 2.276(3)  | Mo(3)–O(16)  | 2.054(4)  |
| Mo(3)–O(23)       | 1.684(4)  | Mo(4)–O(4)   | 1.983(3)  |

|              |          |               |          |
|--------------|----------|---------------|----------|
| Mo(4)–O(6)   | 2.097(3) | Mo(4)–O(12)#1 | 2.290(3) |
| Mo(4)–O(18)  | 2.065(4) | Mo(4)–O(19)   | 1.942(3) |
| Mo(4)–O(26)  | 1.687(4) | Mo(5)–O(3)    | 1.977(3) |
| Mo(5)–O(5)#1 | 2.283(3) | Mo(5)–O(7)    | 2.093(3) |
| Mo(5)–O(15)  | 1.943(4) | Mo(5)–O(21)   | 2.039(4) |
| Mo(5)–O(25)  | 1.683(4) | Mo(6)–O(1)    | 1.976(3) |
| Mo(6)–O(5)#1 | 2.298(3) | Mo(6)–O(7)    | 2.111(4) |
| Mo(6)–O(10)  | 1.939(4) | Mo(6)–O(24)   | 2.052(4) |
| Mo(6)–O(30)  | 1.679(4) | Mn(1)–O(1)    | 2.190(3) |
| Mn(1)–O(1)#2 | 2.190(3) | Mn(1)–O(3)    | 2.191(3) |
| Mn(1)–O(3)#2 | 2.191(3) | Mn(1)–O(4)    | 2.205(3) |
| Mn(1)–O(4)#2 | 2.205(3) | Mn(2)–O(11)#3 | 2.278(3) |
| Mn(2)–O(14)  | 2.131(4) | Mn(2)–O(20)   | 2.154(4) |
| Mn(2)–O(27)  | 2.193(4) | Mn(2)–O(29)#1 | 2.222(4) |
| Mn(2)–O(31)  | 2.279(5) |               |          |

#1: -x+1, -y+2, -z+2; #2: -x, -y+2, -z+1; #3: -x+1, -y+2, -z+1; #4: -x+1, -y+1, -z+1

**Table S3** Selected angles (°) of compound **1**.

| Compound <b>1</b>  |            |                    |            |
|--------------------|------------|--------------------|------------|
| O(2)–Mo(1)–Mo(5)   | 134.70(10) | O(2)–Mo(1)–O(8)#1  | 73.10(13)  |
| O(3)–Mo(1)–Mo(5)   | 48.92(10)  | O(3)–Mo(1)–O(2)    | 86.73(14)  |
| O(3)–Mo(1)–O(8)#1  | 81.24(13)  | O(3)–Mo(1)–O(9)    | 160.13(15) |
| O(8)#1–Mo(1)–Mo(5) | 89.08(8)   | O(9)–Mo(1)–Mo(5)   | 134.54(11) |
| O(9)–Mo(1)–O(2)    | 83.59(14)  | O(9)–Mo(1)–O(8)#1  | 79.35(14)  |
| O(13)–Mo(1)–Mo(5)  | 100.91(13) | O(13)–Mo(1)–O(2)   | 96.20(17)  |
| O(13)–Mo(1)–O(3)   | 101.56(16) | O(13)–Mo(1)–O(8)#1 | 168.87(16) |
| O(13)–Mo(1)–O(9)   | 96.73(17)  | O(13)–Mo(1)–O(15)  | 105.09(17) |
| O(15)–Mo(1)–Mo(5)  | 48.03(10)  | O(15)–Mo(1)–O(2)   | 157.60(15) |
| O(15)–Mo(1)–O(3)   | 95.64(14)  | O(15)–Mo(1)–O(8)#1 | 85.21(14)  |
| O(15)–Mo(1)–O(9)   | 87.00(15)  | O(2)–Mo(2)–Mo(4)   | 134.92(9)  |
| O(2)–Mo(2)–O(8)#1  | 72.54(12)  | O(4)–Mo(2)–Mo(4)   | 49.27(10)  |
| O(4)–Mo(2)–O(2)    | 86.65(14)  | O(4)–Mo(2)–O(8)#1  | 81.62(13)  |
| O(4)–Mo(2)–O(17)   | 161.27(14) | O(8)#1–Mo(2)–Mo(4) | 89.67(8)   |
| O(17)–Mo(2)–Mo(4)  | 133.85(11) | O(17)–Mo(2)–O(2)   | 84.47(14)  |
| O(17)–Mo(2)–O(8)#1 | 79.99(13)  | O(19)–Mo(2)–Mo(4)  | 48.22(10)  |
| O(19)–Mo(2)–O(2)   | 156.55(15) | O(19)–Mo(2)–O(4)   | 95.97(14)  |
| O(19)–Mo(2)–O(8)#1 | 84.75(14)  | O(19)–Mo(2)–O(17)  | 85.90(15)  |
| O(28)–Mo(2)–Mo(4)  | 101.05(15) | O(28)–Mo(2)–O(2)   | 96.61(18)  |
| O(28)–Mo(2)–O(4)   | 102.06(17) | O(28)–Mo(2)–O(8)#1 | 168.46(17) |
| O(28)–Mo(2)–O(17)  | 95.34(18)  | O(28)–Mo(2)–O(19)  | 105.56(19) |
| O(1)–Mo(3)–Mo(6)   | 49.05(10)  | O(1)–Mo(3)–O(6)    | 86.87(14)  |
| O(1)–Mo(3)–O(12)#1 | 80.87(13)  | O(1)–Mo(3)–O(16)   | 160.23(15) |
| O(6)–Mo(3)–Mo(6)   | 134.97(10) | O(6)–Mo(3)–O(12)#1 | 73.28(13)  |

|                     |            |                     |            |
|---------------------|------------|---------------------|------------|
| O(10)–Mo(3)–Mo(6)   | 48.10(11)  | O(10)–Mo(3)–O(1)    | 95.64(15)  |
| O(10)–Mo(3)–O(6)    | 156.78(15) | O(10)–Mo(3)–O(12)#1 | 84.30(14)  |
| O(10)–Mo(3)–O(16)   | 85.72(16)  | O(12)#1–Mo(3)–Mo(6) | 88.75(9)   |
| O(16)–Mo(3)–Mo(6)   | 133.44(11) | O(16)–Mo(3)–O(6)    | 84.39(15)  |
| O(16)–Mo(3)–O(12)#1 | 79.65(14)  | O(23)–Mo(3)–Mo(6)   | 100.91(15) |
| O(23)–Mo(3)–O(1)    | 101.20(17) | O(23)–Mo(3)–O(6)    | 95.81(17)  |
| O(23)–Mo(3)–O(10)   | 106.27(18) | O(23)–Mo(3)–O(12)#1 | 168.85(17) |
| O(23)–Mo(3)–O(16)   | 97.31(18)  | O(4)–Mo(4)–Mo(2)    | 49.06(10)  |
| O(4)–Mo(4)–O(6)     | 86.40(14)  | O(4)–Mo(4)–O(12)#1  | 81.15(13)  |
| O(4)–Mo(4)–O(18)    | 159.73(15) | O(6)–Mo(4)–Mo(2)    | 134.38(10) |
| O(6)–Mo(4)–O(12)#1  | 73.30(13)  | O(12)#1–Mo(4)–Mo(2) | 88.34(9)   |
| O(18)–Mo(4)–Mo(2)   | 132.91(11) | O(18)–Mo(4)–O(6)    | 84.84(14)  |
| O(18)–Mo(4)–O(12)#1 | 78.83(15)  | O(19)–Mo(4)–Mo(2)   | 47.97(11)  |
| O(19)–Mo(4)–O(4)    | 95.52(14)  | O(19)–Mo(4)–O(6)    | 156.17(15) |
| O(19)–Mo(4)–O(12)#1 | 83.50(14)  | O(19)–Mo(4)–O(18)   | 85.39(15)  |
| O(26)–Mo(4)–Mo(2)   | 100.90(15) | O(26)–Mo(4)–O(4)    | 102.22(18) |
| O(26)–Mo(4)–O(6)    | 97.52(17)  | O(26)–Mo(4)–O(12)#1 | 170.13(17) |
| O(26)–Mo(4)–O(18)   | 97.03(19)  | O(26)–Mo(4)–O(19)   | 105.22(18) |
| O(3)–Mo(5)–Mo(1)    | 48.67(10)  | O(3)–Mo(5)–O(5)#1   | 81.65(13)  |
| O(3)–Mo(5)–O(7)     | 86.62(14)  | O(3)–Mo(5)–O(21)    | 161.28(16) |
| O(5)#1–Mo(5)–Mo(1)  | 88.41(8)   | O(7)–Mo(5)–Mo(1)    | 134.24(10) |
| O(7)–Mo(5)–O(5)#1   | 73.73(13)  | O(15)–Mo(5)–Mo(1)   | 47.96(10)  |
| O(15)–Mo(5)–O(3)    | 95.32(14)  | O(15)–Mo(5)–O(5)#1  | 83.95(14)  |
| O(15)–Mo(5)–O(7)    | 157.10(15) | O(15)–Mo(5)–O(21)   | 87.00(16)  |
| O(21)–Mo(5)–Mo(1)   | 134.60(12) | O(21)–Mo(5)–O(5)#1  | 80.12(15)  |
| O(21)–Mo(5)–O(7)    | 84.22(15)  | O(25)–Mo(5)–Mo(1)   | 100.69(14) |
| O(25)–Mo(5)–O(3)    | 101.54(17) | O(25)–Mo(5)–O(5)#1  | 170.19(16) |
| O(25)–Mo(5)–O(7)    | 97.08(17)  | O(25)–Mo(5)–O(15)   | 104.83(18) |
| O(25)–Mo(5)–O(21)   | 95.77(18)  | O(1)–Mo(6)–Mo(3)    | 49.24(10)  |
| O(1)–Mo(6)–O(5)#1   | 81.11(13)  | O(1)–Mo(6)–O(7)     | 85.80(14)  |
| O(1)–Mo(6)–O(24)    | 160.05(15) | O(5)#1–Mo(6)–Mo(3)  | 88.87(9)   |
| O(7)–Mo(6)–Mo(3)    | 134.07(10) | O(7)–Mo(6)–O(5)#1   | 73.11(13)  |
| O(10)–Mo(6)–Mo(3)   | 48.20(11)  | O(10)–Mo(6)–O(1)    | 95.92(15)  |
| O(10)–Mo(6)–O(5)#1  | 84.20(14)  | O(10)–Mo(6)–O(7)    | 156.73(15) |
| O(10)–Mo(6)–O(24)   | 86.21(16)  | O(24)–Mo(6)–Mo(3)   | 134.01(12) |
| O(24)–Mo(6)–O(5)#1  | 79.37(14)  | O(24)–Mo(6)–O(7)    | 84.63(15)  |
| O(30)–Mo(6)–Mo(3)   | 100.04(15) | O(30)–Mo(6)–O(1)    | 100.92(18) |
| O(30)–Mo(6)–O(5)#1  | 169.81(18) | O(30)–Mo(6)–O(7)    | 96.99(18)  |
| O(30)–Mo(6)–O(10)   | 105.40(19) | O(30)–Mo(6)–O(24)   | 97.60(19)  |
| O(1)–Mn(1)–O(1)#2   | 180.0      | O(1)#2–Mn(1)–O(3)   | 84.07(13)  |
| O(1)–Mn(1)–O(3)     | 95.93(13)  | O(1)–Mn(1)–O(3)#2   | 84.07(13)  |
| O(1)#2–Mn(1)–O(3)#2 | 95.93(13)  | O(1)–Mn(1)–O(4)#2   | 84.19(13)  |
| O(1)–Mn(1)–O(4)     | 95.81(13)  | O(1)#2–Mn(1)–O(4)   | 84.19(13)  |



|                       |            |                       |            |
|-----------------------|------------|-----------------------|------------|
| O(1)#2–Mn(1)–O(4)#2   | 95.81(13)  | O(3)–Mn(1)–O(3)#2     | 180.0      |
| O(3)–Mn(1)–O(4)       | 96.59(12)  | O(3)–Mn(1)–O(4)#2     | 83.41(12)  |
| O(3)#2–Mn(1)–O(4)     | 83.41(12)  | O(3)#2–Mn(1)–O(4)#2   | 96.59(12)  |
| O(4)#2–Mn(1)–O(4)     | 180.0      | O(11)#3–Mn(2)–O(31)   | 83.77(17)  |
| O(14)–Mn(2)–O(11)#3   | 171.34(15) | O(14)–Mn(2)–O(20)     | 87.36(15)  |
| O(14)–Mn(2)–O(27)     | 96.35(16)  | O(14)–Mn(2)–O(29)#1   | 100.98(15) |
| O(14)–Mn(2)–O(31)     | 94.61(18)  | O(20)–Mn(2)–O(11)#3   | 84.04(14)  |
| O(20)–Mn(2)–O(27)     | 167.16(16) | O(20)–Mn(2)–O(29)#1   | 101.88(17) |
| O(20)–Mn(2)–O(31)     | 85.48(18)  | O(27)–Mn(2)–O(11)#3   | 91.86(16)  |
| O(27)–Mn(2)–O(29)#1   | 89.51(17)  | O(27)–Mn(2)–O(31)     | 81.98(18)  |
| O(29)#1–Mn(2)–O(11)#3 | 81.81(15)  | O(29)#1–Mn(2)–O(31)   | 162.99(19) |
| Mo(3)–O(1)–Mn(1)      | 134.37(17) | Mo(6)–O(1)–Mo(3)      | 81.71(13)  |
| Mo(6)–O(1)–Mn(1)      | 134.73(18) | Mo(1)–O(2)–Mo(2)      | 111.75(15) |
| Mo(1)–O(3)–Mo(5)      | 82.40(13)  | Mo(1)–O(3)–Mn(1)      | 134.14(17) |
| Mo(5)–O(3)–Mn(1)      | 133.73(17) | Mo(2)–O(4)–Mo(4)      | 81.67(12)  |
| Mo(2)–O(4)–Mn(1)      | 133.49(17) | Mo(4)–O(4)–Mn(1)      | 134.29(17) |
| Mo(5)#1–O(5)–Mo(6)#1  | 99.67(13)  | Mo(4)–O(6)–Mo(3)      | 112.55(16) |
| Mo(5)–O(7)–Mo(6)      | 112.76(16) | Mo(1)#1–O(8)–Mo(2)#1  | 101.91(13) |
| Mo(6)–O(10)–Mo(3)     | 83.70(14)  | Mo(3)#1–O(12)–Mo(4)#1 | 100.13(13) |
| Mo(1)–O(15)–Mo(5)     | 84.00(13)  | Mo(2)–O(19)–Mo(4)     | 83.82(14)  |

#1: -x+1, -y+2, -z+2; #2: -x, -y+2, -z+1; #3: -x+1, -y+2, -z+1; #4: -x+1, -y+1, -z+1

**Table S4** Selected bond lengths (Å) of compound **2**.

| Compound <b>2</b> |           |             |           |
|-------------------|-----------|-------------|-----------|
| Mo(1)–Mo(3)       | 2.5970(5) | Mo(1)–O(2)  | 1.937(3)  |
| Mo(1)–O(5)        | 1.973(3)  | Mo(1)–O(7)  | 2.126(3)  |
| Mo(1)–O(8)        | 2.239(3)  | Mo(1)–O(18) | 2.056(3)  |
| Mo(1)–O(24)       | 1.690(3)  | Mo(2)–Mo(5) | 2.5907(5) |
| Mo(2)–O(3)        | 1.971(3)  | Mo(2)–O(7)  | 2.136(3)  |
| Mo(2)–O(8)        | 2.299(3)  | Mo(2)–O(13) | 2.038(3)  |
| Mo(2)–O(17)       | 1.929(3)  | Mo(2)–O(23) | 1.681(4)  |
| Mo(3)–O(2)        | 1.937(3)  | Mo(3)–O(5)  | 1.976(3)  |
| Mo(3)–O(9)        | 2.269(3)  | Mo(3)–O(10) | 2.106(3)  |
| Mo(3)–O(15)       | 2.038(4)  | Mo(3)–O(27) | 1.680(3)  |
| Mo(4)–Mo(6)       | 2.5921(5) | Mo(4)–O(1)  | 1.943(3)  |
| Mo(4)–O(4)        | 1.977(3)  | Mo(4)–O(6)  | 2.099(3)  |
| Mo(4)–O(12)       | 2.285(3)  | Mo(4)–O(14) | 2.032(3)  |
| Mo(4)–O(26)       | 1.682(3)  | Mo(5)–O(3)  | 1.976(3)  |
| Mo(5)–O(6)        | 2.111(3)  | Mo(5)–O(12) | 2.299(3)  |
| Mo(5)–O(17)       | 1.935(3)  | Mo(5)–O(21) | 2.054(3)  |
| Mo(5)–O(25)       | 1.680(4)  | Mo(6)–O(1)  | 1.938(3)  |
| Mo(6)–O(4)        | 1.973(3)  | Mo(6)–O(9)  | 2.282(3)  |

|               |          |               |          |
|---------------|----------|---------------|----------|
| Mo(6)–O(10)   | 2.117(3) | Mo(6)–O(19)   | 2.044(4) |
| Mo(6)–O(28)   | 1.681(4) | Mn(1)–O(3)    | 2.195(3) |
| Mn(1)–O(3)#1  | 2.195(3) | Mn(1)–O(4)    | 2.207(3) |
| Mn(1)–O(4)#1  | 2.207(3) | Mn(1)–O(5)#1  | 2.192(3) |
| Mn(1)–O(5)    | 2.192(3) | Mn(2)–O(11)   | 2.157(3) |
| Mn(2)–O(16)#2 | 2.333(3) | Mn(2)–O(20)#3 | 2.140(3) |
| Mn(2)–O(29)   | 2.101(4) | Mn(2)–O(30)   | 2.190(4) |
| Mn(2)–O(31)   | 2.285(5) |               |          |

#1: -x+1, -y+2, -z+2; #2: -x, -y+2, -z+1; #3: -x+1, -y+2, -z+1; #4: -x+1, -y+1, -z+1

**Table S5** Selected angles (°) of compound **2**.

| Compound <b>2</b> |            |                   |            |
|-------------------|------------|-------------------|------------|
| O(2)–Mo(1)–Mo(3)  | 47.91(10)  | O(2)–Mo(1)–O(5)   | 95.56(13)  |
| O(2)–Mo(1)–O(7)   | 158.56(13) | O(2)–Mo(1)–O(8)   | 85.86(13)  |
| O(2)–Mo(1)–O(18)  | 86.50(14)  | O(5)–Mo(1)–Mo(3)  | 48.93(9)   |
| O(5)–Mo(1)–O(7)   | 86.60(13)  | O(5)–Mo(1)–O(8)   | 81.02(12)  |
| O(5)–Mo(1)–O(18)  | 159.89(13) | O(7)–Mo(1)–Mo(3)  | 134.70(9)  |
| O(7)–Mo(1)–O(8)   | 73.38(12)  | O(8)–Mo(1)–Mo(3)  | 89.23(8)   |
| O(18)–Mo(1)–Mo(3) | 133.84(10) | O(18)–Mo(1)–O(7)  | 84.44(13)  |
| O(18)–Mo(1)–O(8)  | 79.18(12)  | O(24)–Mo(1)–Mo(3) | 101.11(12) |
| O(24)–Mo(1)–O(2)  | 105.37(16) | O(24)–Mo(1)–O(5)  | 101.31(15) |
| O(24)–Mo(1)–O(7)  | 95.05(15)  | O(24)–Mo(1)–O(8)  | 168.13(15) |
| O(24)–Mo(1)–O(18) | 97.38(15)  | O(3)–Mo(2)–Mo(5)  | 49.05(9)   |
| O(3)–Mo(2)–O(7)   | 86.53(12)  | O(3)–Mo(2)–O(8)   | 80.45(12)  |
| O(3)–Mo(2)–O(13)  | 160.20(14) | O(7)–Mo(2)–Mo(5)  | 134.49(9)  |
| O(7)–Mo(2)–O(8)   | 71.97(12)  | O(8)–Mo(2)–Mo(5)  | 88.87(7)   |
| O(13)–Mo(2)–Mo(5) | 135.40(10) | O(13)–Mo(2)–O(7)  | 82.77(13)  |
| O(13)–Mo(2)–O(8)  | 80.41(13)  | O(17)–Mo(2)–Mo(5) | 47.98(10)  |
| O(17)–Mo(2)–O(3)  | 95.33(13)  | O(17)–Mo(2)–O(7)  | 155.35(14) |
| O(17)–Mo(2)–O(8)  | 84.07(13)  | O(17)–Mo(2)–O(13) | 87.70(14)  |
| O(23)–Mo(2)–Mo(5) | 100.83(13) | O(23)–Mo(2)–O(3)  | 102.04(16) |
| O(23)–Mo(2)–O(7)  | 97.43(16)  | O(23)–Mo(2)–O(8)  | 169.06(15) |
| O(23)–Mo(2)–O(13) | 95.85(16)  | O(23)–Mo(2)–O(17) | 106.15(17) |
| O(2)–Mo(3)–Mo(1)  | 47.89(10)  | O(2)–Mo(3)–O(5)   | 95.45(13)  |
| O(2)–Mo(3)–O(9)   | 84.61(13)  | O(2)–Mo(3)–O(10)  | 157.15(13) |
| O(2)–Mo(3)–O(15)  | 87.49(15)  | O(5)–Mo(3)–Mo(1)  | 48.83(9)   |
| O(5)–Mo(3)–O(9)   | 81.16(12)  | O(5)–Mo(3)–O(10)  | 86.79(13)  |
| O(5)–Mo(3)–O(15)  | 160.99(14) | O(9)–Mo(3)–Mo(1)  | 88.38(8)   |
| O(10)–Mo(3)–Mo(1) | 134.53(9)  | O(10)–Mo(3)–O(9)  | 73.25(12)  |
| O(15)–Mo(3)–Mo(1) | 134.98(12) | O(15)–Mo(3)–O(9)  | 80.43(13)  |
| O(15)–Mo(3)–O(10) | 83.43(14)  | O(27)–Mo(3)–Mo(1) | 101.28(12) |
| O(27)–Mo(3)–O(2)  | 105.35(16) | O(27)–Mo(3)–O(5)  | 101.57(16) |

|                   |            |                     |            |
|-------------------|------------|---------------------|------------|
| O(27)–Mo(3)–O(9)  | 169.24(15) | O(27)–Mo(3)–O(10)   | 96.41(15)  |
| O(27)–Mo(3)–O(15) | 95.70(17)  | O(1)–Mo(4)–Mo(6)    | 48.00(10)  |
| O(1)–Mo(4)–O(4)   | 95.52(14)  | O(1)–Mo(4)–O(6)     | 156.59(13) |
| O(1)–Mo(4)–O(12)  | 84.24(13)  | O(1)–Mo(4)–O(14)    | 85.12(15)  |
| O(4)–Mo(4)–Mo(6)  | 48.91(9)   | O(4)–Mo(4)–O(6)     | 87.19(13)  |
| O(4)–Mo(4)–O(12)  | 80.63(12)  | O(4)–Mo(4)–O(14)    | 159.76(14) |
| O(6)–Mo(4)–Mo(6)  | 135.01(9)  | O(6)–Mo(4)–O(12)    | 73.23(12)  |
| O(12)–Mo(4)–Mo(6) | 88.14(8)   | O(14)–Mo(4)–Mo(6)   | 132.62(11) |
| O(14)–Mo(4)–O(6)  | 84.51(14)  | O(14)–Mo(4)–O(12)   | 79.30(13)  |
| O(26)–Mo(4)–Mo(6) | 100.70(13) | O(26)–Mo(4)–O(1)    | 105.64(17) |
| O(26)–Mo(4)–O(4)  | 101.05(16) | O(26)–Mo(4)–O(6)    | 96.59(16)  |
| O(26)–Mo(4)–O(12) | 169.65(16) | O(26)–Mo(4)–O(14)   | 98.22(16)  |
| O(3)–Mo(5)–Mo(2)  | 48.90(9)   | O(3)–Mo(5)–O(6)     | 86.64(12)  |
| O(3)–Mo(5)–O(12)  | 80.99(12)  | O(3)–Mo(5)–O(21)    | 159.18(14) |
| O(6)–Mo(5)–Mo(2)  | 134.57(9)  | O(6)–Mo(5)–O(12)    | 72.73(12)  |
| O(12)–Mo(5)–Mo(2) | 89.11(8)   | O(17)–Mo(5)–Mo(2)   | 47.81(10)  |
| O(17)–Mo(5)–O(3)  | 95.01(13)  | O(17)–Mo(5)–O(6)    | 156.02(14) |
| O(17)–Mo(5)–O(12) | 83.87(13)  | O(17)–Mo(5)–O(21)   | 85.30(14)  |
| O(21)–Mo(5)–Mo(2) | 132.69(10) | O(21)–Mo(5)–O(6)    | 84.88(13)  |
| O(21)–Mo(5)–O(12) | 78.34(13)  | O(25)–Mo(5)–Mo(2)   | 100.95(13) |
| O(25)–Mo(5)–O(3)  | 102.40(16) | O(25)–Mo(5)–O(6)    | 96.98(16)  |
| O(25)–Mo(5)–O(12) | 169.10(15) | O(25)–Mo(5)–O(17)   | 105.97(17) |
| O(25)–Mo(5)–O(21) | 97.49(17)  | O(1)–Mo(6)–Mo(4)    | 48.19(10)  |
| O(1)–Mo(6)–O(4)   | 95.84(14)  | O(1)–Mo(6)–O(9)     | 85.52(13)  |
| O(1)–Mo(6)–O(10)  | 157.74(14) | O(1)–Mo(6)–O(19)    | 85.71(16)  |
| O(4)–Mo(6)–Mo(4)  | 49.05(9)   | O(4)–Mo(6)–O(9)     | 80.91(12)  |
| O(4)–Mo(6)–O(10)  | 85.70(13)  | O(4)–Mo(6)–O(19)    | 159.61(14) |
| O(9)–Mo(6)–Mo(4)  | 89.33(8)   | O(10)–Mo(6)–Mo(4)   | 133.89(9)  |
| O(10)–Mo(6)–O(9)  | 72.76(12)  | O(19)–Mo(6)–Mo(4)   | 133.37(12) |
| O(19)–Mo(6)–O(9)  | 78.94(13)  | O(19)–Mo(6)–O(10)   | 85.40(14)  |
| O(28)–Mo(6)–Mo(4) | 101.32(14) | O(28)–Mo(6)–O(1)    | 105.24(17) |
| O(28)–Mo(6)–O(4)  | 102.26(17) | O(28)–Mo(6)–O(9)    | 168.25(16) |
| O(28)–Mo(6)–O(10) | 96.06(16)  | O(28)–Mo(6)–O(19)   | 96.89(18)  |
| O(3)#1–Mn(1)–O(3) | 180.0      | O(3)–Mn(1)–O(4)     | 96.61(12)  |
| O(3)–Mn(1)–O(4)#1 | 83.39(12)  | O(3)#1–Mn(1)–O(4)#1 | 96.60(12)  |
| O(3)#1–Mn(1)–O(4) | 83.40(12)  | O(4)#1–Mn(1)–O(4)   | 180.0      |
| O(5)–Mn(1)–O(3)   | 96.76(12)  | O(5)#1–Mn(1)–O(3)#1 | 96.76(12)  |
| O(5)#1–Mn(1)–O(3) | 83.24(12)  | O(5)–Mn(1)–O(3)#1   | 83.24(12)  |
| O(5)–Mn(1)–O(4)   | 95.77(12)  | O(5)–Mn(1)–O(4)#1   | 84.23(12)  |
| O(5)#1–Mn(1)–O(4) | 84.23(12)  | O(5)#1–Mn(1)–O(4)#1 | 95.77(12)  |
| O(5)–Mn(1)–O(5)#1 | 180.0      | O(11)–Mn(2)–O(16)#2 | 171.62(13) |
| O(11)–Mn(2)–O(30) | 94.54(16)  | O(11)–Mn(2)–O(31)   | 93.67(17)  |

|                     |            |                       |            |
|---------------------|------------|-----------------------|------------|
| O(20)#3–Mn(2)–O(11) | 88.70(13)  | O(20)#3–Mn(2)–O(16)#2 | 83.74(13)  |
| O(20)#3–Mn(2)–O(30) | 165.06(16) | O(20)#3–Mn(2)–O(31)   | 84.03(16)  |
| O(29)–Mn(2)–O(11)   | 99.34(15)  | O(29)–Mn(2)–O(16)#2   | 85.71(14)  |
| O(29)–Mn(2)–O(20)#3 | 101.22(16) | O(29)–Mn(2)–O(30)     | 92.66(18)  |
| O(29)–Mn(2)–O(31)   | 166.04(18) | O(30)–Mn(2)–O(16)#2   | 91.89(16)  |
| O(30)–Mn(2)–O(31)   | 81.21(17)  | O(31)–Mn(2)–O(16)#2   | 81.99(17)  |
| Mo(6)–O(1)–Mo(4)    | 83.81(13)  | Mo(1)–O(2)–Mo(3)      | 84.20(13)  |
| Mo(2)–O(3)–Mo(5)    | 82.06(12)  | Mo(2)–O(3)–Mn(1)      | 134.12(16) |
| Mo(5)–O(3)–Mn(1)    | 134.00(16) | Mo(4)–O(4)–Mn(1)      | 133.36(16) |
| Mo(6)–O(4)–Mo(4)    | 82.04(12)  | Mo(6)–O(4)–Mn(1)      | 134.90(15) |
| Mo(1)–O(5)–Mo(3)    | 82.24(12)  | Mo(1)–O(5)–Mn(1)      | 133.78(16) |
| Mo(3)–O(5)–Mn(1)    | 134.05(16) | Mo(4)–O(6)–Mo(5)      | 113.15(14) |
| Mo(1)–O(7)–Mo(2)    | 111.78(14) | Mo(1)–O(8)–Mo(2)      | 102.09(12) |
| Mo(3)–O(9)–Mo(6)    | 100.85(12) | Mo(3)–O(10)–Mo(6)     | 112.33(14) |
| Mo(4)–O(12)–Mo(5)   | 100.11(12) | Mo(2)–O(17)–Mo(5)     | 84.21(13)  |

#1:  $-x+1, -y+2, -z+2$ ; #2:  $-x, -y+2, -z+1$ ; #3:  $-x+1, -y+2, -z+1$ ; #4:  $-x+1, -y+1, -z+1$

**Table S6** Hydrogen bonding information in compound **1** (Å, °).

| D–H...A             | D–H / Å | H...A / Å | D...A / Å | D–H...A / ° |
|---------------------|---------|-----------|-----------|-------------|
| 2N(1)–H(1B)...O(22) | 0.89    | 1.90      | 2.787(14) | 173         |

**Table S7** Hydrogen bonding information in compound **2** (Å, °).

| D–H...A             | D–H / Å | H...A / Å | D...A / Å | D–H...A / ° |
|---------------------|---------|-----------|-----------|-------------|
| 3N(1)–H(1A)...O(22) | 0.89    | 1.85      | 2.730(7)  | 169         |
| 3N(1)–H(1C)...O(7)  | 0.89    | 2.17      | 3.062(9)  | 175         |

**Table S8** Three pairs of (I–I', II–II', III–III') redox peaks involved in electrochemical redox reactions.

| Redox peaks | Electrochemical redox reactions                                                                                                       |
|-------------|---------------------------------------------------------------------------------------------------------------------------------------|
| I–I'        | $\text{P}_4\text{Mo}_6\text{O}_{31}^{12-} + 2\text{e}^- + 2\text{H}^+ = \text{H}_2\text{P}_4\text{Mo}_6\text{O}_{31}^{12-}$           |
| II–II'      | $\text{H}_2\text{P}_4\text{Mo}_6\text{O}_{31}^{12-} + 2\text{e}^- + 2\text{H}^+ = \text{H}_4\text{P}_4\text{Mo}_6\text{O}_{31}^{12-}$ |
| III–III'    | $\text{H}_4\text{P}_4\text{Mo}_6\text{O}_{31}^{12-} + 2\text{e}^- + 2\text{H}^+ = \text{H}_6\text{P}_4\text{Mo}_6\text{O}_{31}^{12-}$ |

**Table S9** The linear regression equation of compounds **1–2** on Cr(VI).

| Material          | The linear regression equation                                              |
|-------------------|-----------------------------------------------------------------------------|
| Compound <b>1</b> | $I (\mu\text{A}) = -0.059 \times C_{(\mu\text{M})} - 1.42568 (R^2 = 0.996)$ |
| Compound <b>2</b> | $I (\mu\text{A}) = -0.078 \times C_{(\mu\text{M})} - 0.7245 (R^2 = 0.999)$  |

**Table S10** Comparison of compounds **1–2** with reported sensors for the determination of Cr(VI)

| Sensors materials                                   | Method | LOD ( $\mu\text{M}$ ) | Reference        |
|-----------------------------------------------------|--------|-----------------------|------------------|
| Compound <b>1</b>                                   | i-t    | 0.48                  | <b>this work</b> |
| Compound <b>2</b>                                   | i-t    | 0.0916                | <b>this work</b> |
| Ag GNF                                              | i-t    | 0.0125                | S4               |
| {Ni(P <sub>4</sub> Mo <sub>6</sub> ) <sub>2</sub> } | i-t    | 0.321                 | S5               |
| Au NPs@Carbon nanotubes                             | i-t    | 0.72                  | S6               |
| Ag NPs-carbon SPE                                   | DPV    | 0.85                  | S7               |
| Au NPs-carbon SPE                                   | DPV    | 0.40                  | S7               |
| Au NPs @ SPE                                        | DPV    | 0.1                   | S8               |
| Au NPs @ ITO                                        | CV     | 2                     | S9               |
| Graphite SPE                                        | LSV    | 0.36                  | S10              |
| Gold screen printed macro electrode                 | LSV    | 4.4                   | S11              |
| Ag plated-GCE                                       | DP-ASV | 0.10                  | S12              |

SPE = screen printed electrode; ITO = indium-tin oxide electrode; GNF = golden nanoporous film NPs-nanoparticles; DPV = differential pulse voltammetry; LSV = Linear sweep voltammetry; DP-ASV = differential pulse anodic stripping voltammetry.

## References

- S1. Krause. L, Herbst-Irmer. R, Sheldrick. G. M, Stalke. D, *J. Appl. Crystallogr.*, 2015, **48**, 3.
- S2. Sheldrick. G. M, *Acta. Cryst.*, 2015, **A71**, 3.
- S3. Sheldrick. G. M, *Acta. Crystallogr. C. Struct. Chem.*, 2015, **C71**, 3.
- S4. H. Xu, Q. Zheng, P. Yang, J. Liu, S. Xing and L. Jin, *Sci. China: Chem.*, 2011, **54**, 1004.
- S5. Y. L. Wang, Y. Y. Ma, Q. Zhao, L. Hou and Z. G. Han, *Sens. Actuators, B*, 2020, **305**, 127469.
- S6. J. Tu, Y. Gan, T. Liang, H. Wan and P. Wang, *Sens. Actuators, B*, 2018, **272**, 582.
- S7. O. Domínguez-Renedo, L. Ruiz-Espelt, N. García-Astorgano and M. J. Arcos-Martínez, *Talanta*, 2008, **76**, 854.
- S8. J. Song, H. Zhou, R. Gao, Y. Zhang, H. Zhang, Y. Zhang, G. Wang, P. K. Wong and H. Zhao, *ACS Sens.*, 2018, **3**, 792.
- S9. P. M. Hallam, D. K. Kampouris, R. O. Kadara and C. E. Banks, *Analyst*, 2010, **135**, 1947.

- S10. C. B. Breslin, D. Branagan and L. M. Garry, *J. Appl. Electrochem.*, 2019, **49**, 195.
- S11. J. P. Metters, R. O. Kadara, C. E. Banks, *Analyst.*, 2012, **137**, 896.
- S12. Z. Stojanović, Z. Koudelkova, E. Sedlackova, D. Hynek, L. Richtera, V. Adam, *Analytical Methods.*, 2018, **10**, 2917.
